# Supplementary material for: Performance of a passive sampler for the determination of time averaged concentrations of nitrate and phosphate in water
Source: Royal Society of Chemistry journal article supplement (doi:10.1039/c3em00038a), 2013-01-01
Supplement: c3em00038a.pdf [file c3em00038a.pdf]

pH;temperature;Turbulence;Nitrate

5;7;50;2.36

5;7;50;2.84

5;7;50;3.39

5;14;200;4.34

5;14;200;3.24

5;14;200;3.66

5;21;400;5.70

5;21;400;4.82

5;21;400;4.62

7;7;200;2.89

7;7;200;2.79

7;7;200;3.48

7;14;400;4.50

7;14;400;2.96

7;14;400;4.40

7;21;50;5.50

7;21;50;4.21

7;21;50;4.25

9;7;400;2.58

9;7;400;2.83

9;7;400;3.59

9;14;50;3.98

9;14;50;3.95

9;14;50;4.26

9;21;200;5.33

9;21;200;4.04

9;21;200;2.52
