# Supplementary material for: Performance of a passive sampler for the determination of time averaged concentrations of nitrate and phosphate in water
Source: Royal Society of Chemistry journal article supplement (doi:10.1039/c3em00038a), 2013-01-01
Supplement: c3em00038a_2.pdf [file c3em00038a_2.pdf]

pH;temperature;Turbulence;Phosphate

5;7;50;0.720275

5;7;50;0.72695

5;7;50;0.679875

5;14;200;1.0807

5;14;200;0.769525

5;14;200;1.12935

5;21;400;1.314475

5;21;400;1.35795

5;21;400;1.2579

7;7;200;0.881825

7;7;200;0.9266

7;7;200;1.1406

7;14;400;1.785475

7;14;400;1.357875

7;14;400;1.56915

7;21;50;2.183725

7;21;50;1.89105

7;21;50;1.935925

9;7;400;1.21615

9;7;400;1.42515

9;7;400;2.10165

9;14;50;1.205675

9;14;50;1.594425

9;14;50;1.91215

9;21;200;2.114325

9;21;200;1.883975

9;21;200;2.04195
